# Supplementary material for: Bears in a Forest of Gene Trees: Phylogenetic Inference Is Complicated by Incomplete Lineage Sorting and Gene Flow
Source: PubMed Central journal article supplement — Mol Biol Evol. 2014 Jun 5;31(8):2004–17. doi: 10.1093/molbev/msu186 (PMC4104321; doi:10.1093/molbev/msu186), 2014-06-05
Supplement: supp_msu186_Kutschera_etal_BearEvol_suppl_final_20140617.pdf [file supp_msu186_Kutschera_etal_BearEvol_suppl_final_20140617.pdf]

## Supplementary Information

### **Bears in a forest of gene trees: Phylogenetic inference is complicated by incomplete lineage sorting and gene flow**

Verena E. Kutschera, Tobias Bidon, Frank Hailer, Julia L. Rodi, Steven R. Fain, Axel Janke

#### **Corresponding authors:**

Verena E. Kutschera, Biodiversity and Climate Research Centre (BiK-F), Senckenberg Gesellschaft für Naturforschung, Senckenberganlage 25, 60325 Frankfurt am Main, Germany.  
Email: [v.kutschera@gmx.net](mailto:v.kutschera@gmx.net)

Axel Janke, Biodiversity and Climate Research Centre (BiK-F), Senckenberg Gesellschaft für Naturforschung, Senckenberganlage 25, 60325 Frankfurt am Main, Germany and Goethe University Frankfurt, Institute for Ecology, Evolution and Diversity, 60438 Frankfurt am Main, Germany. Email: [axel.janke@senckenberg.de](mailto:axel.janke@senckenberg.de)

## Phylogenetic analyses of concatenated data

We conducted phylogenetic analyses of concatenated autosomal data to highlight the extent of reduction in variation resulting from the concatenation procedure, and for comparison with the multi-locus species tree (fig. 2A) and phylogenetic trees from previous studies. Intraspecific and intra-individual polymorphisms were disregarded, because for concatenation, for each species all variation within and among individuals had to be collapsed into one single 50% majority-rule-consensus sequence. Unresolved sites with each variant occurring 50% were deleted from the alignments. Phylogenetic trees from concatenated nuclear data were calculated in MrBayes 3.2 (Ronquist et al. 2012) and in Treefinder version 2008 (Jobb et al. 2004). For Bayesian inferences in MrBayes we used one cold and three heated chains and ran the analyses for 10,000,000 Markov chain Monte Carlo generations sampling every 2,000th generation, with a burnin of 25%. We confirmed convergence in Tracer v1.5 (effective sampling size >200). Maximum likelihood analyses were performed in Treefinder with 10,000 bootstrap replicates. In Bayesian and maximum likelihood analyses of concatenated (1) Y-chromosomal, (2) autosomal, and (3) autosomal/Y-chromosomal markers combined, the American black bear was placed as sister-taxon to the brown and polar bear lineage with high statistical support, and the sun bear was sister-taxon to a clade including the sloth and Asian black bear (supplementary figure S2, Supplementary Material online). When analyzing the autosomal and Y-chromosomal data separately, support for the sun/sloth/Asian black bear clade was limited, but it was high in the combined analyses. Statistical support for Ursinae forming a monophyletic group and for the spectacled bear as sister-taxon to all ursines was high for all three datasets (Y-chromosomal, autosomal, autosomal/Y-chromosomal combined); the giant panda was the outgroup.

## Supplementary tables

**Supplementary table S1: Details of samples and sequences used in the study.**

|                                                                               | Species name        | Scientific name               | Lab ID   | Geographic origin                               | Sex    | Accession numbers and/or source study |                                                          |                       |
|-------------------------------------------------------------------------------|---------------------|-------------------------------|----------|-------------------------------------------------|--------|---------------------------------------|----------------------------------------------------------|-----------------------|
|                                                                               |                     |                               |          |                                                 |        | Autosomal markers                     | Y-chromosomal markers                                    | Mitochondrial genomes |
| <b>14 autosomal introns and 5.9 kb Y-chromosomal sequence (present study)</b> |                     |                               |          |                                                 |        |                                       |                                                          |                       |
| 1                                                                             | Giant panda         | <i>Ailuropoda melanoleuca</i> | AmeC85   | unknown                                         | male   | HG974607-HG974634                     | HG975027-HG975031                                        | --                    |
| 2                                                                             | Giant panda         | <i>Ailuropoda melanoleuca</i> | Amegenom | unknown                                         | female | Giant panda genome (Li et al. 2010)   | --                                                       | --                    |
| 3                                                                             | Spectacled bear     | <i>Tremarctos ornatus</i>     | TorCha   | Zoo Basel, Switzerland; ISO Fdx 250229600006729 | male   | HG974803-HG974830                     | HG975052-HG975056; HG423284-HG423285 (Bidon et al. 2014) | --                    |
| 4                                                                             | Spectacled bear     | <i>Tremarctos ornatus</i>     | TorNob   | Zoo Basel, Switzerland; ISO Fdx 968000002054943 | male   | HG974831-HG974858                     | HG975057-HG975061                                        | --                    |
| 5                                                                             | Sloth bear          | <i>Melursus ursinus</i>       | MURL42   | Sunset Zoo Manhattan, KS, USA; Studbook# 460    | male   | HG974719-HG974746                     | HG975042-HG975046                                        | --                    |
| 6                                                                             | Sloth bear          | <i>Melursus ursinus</i>       | MURL43   | Philadelphia Zoo, PA, USA                       | male   | HG974747-HG974774                     | HG975047-HG975051                                        | --                    |
| 7                                                                             | Sloth bear          | <i>Melursus ursinus</i>       | MURL44   | India; Studbook# 442                            | female | HG974775-HG974802                     | --                                                       | --                    |
| 8                                                                             | Sun bear            | <i>Helarctos malayanus</i>    | HMAL45   | Miami Metro Zoo, FL, USA; Studbook# 635         | male   | HG974635-HG974662                     | HG975032-HG975036                                        | --                    |
| 9                                                                             | Sun bear            | <i>Helarctos malayanus</i>    | HMAL46   | San Diego Zoo, CA, USA; Studbook# 617           | male   | HG974663-HG974690                     | HG975037-HG975041                                        | --                    |
| 10                                                                            | Sun bear            | <i>Helarctos malayanus</i>    | HMAL47   | St. Louis Zoo, MO, USA; Studbook# 644           | female | HG974691-HG974718                     | --                                                       | --                    |
| 11                                                                            | Asian black bear    | <i>Ursus thibethanus</i>      | UTHL48   | John Ball Zoo, MI, USA; Studbook# 401           | male   | HG974943-HG974970                     | HG975077-HG975081                                        | --                    |
| 12                                                                            | Asian black bear    | <i>Ursus thibethanus</i>      | UTHL49   | Southwick's Zoo, MA, USA                        | female | HG974971-HG974998                     | --                                                       | --                    |
| 13                                                                            | Asian black bear    | <i>Ursus thibethanus</i>      | UTHL50   | Denver Zoo, CO, USA; Studbook# 585              | female | HG974999-HG975026                     | --                                                       | --                    |
| 14                                                                            | American black bear | <i>Ursus americanus</i>       | Uam1203  | Yosemite NP, Mariposa, CA, USA                  | male   | see Hailer et al. (2012)              | --                                                       | --                    |
| 15                                                                            | American black bear | <i>Ursus americanus</i>       | Uam13724 | Wesley, Washington, ME, USA                     | female | see Hailer et al. (2012)              | --                                                       | --                    |
| 16                                                                            | American black bear | <i>Ursus americanus</i>       | Uam16103 | Tanana Flats, AK, USA                           | female | see Hailer et al. (2012)              | --                                                       | --                    |

|    | Species name        | Scientific name         | Lab ID    | Geographic origin                | Sex    | Accession numbers and/or source study |                                                                |                       |
|----|---------------------|-------------------------|-----------|----------------------------------|--------|---------------------------------------|----------------------------------------------------------------|-----------------------|
|    |                     |                         |           |                                  |        | Autosomal markers                     | Y-chromosomal markers                                          | Mitochondrial genomes |
| 17 | American black bear | <i>Ursus americanus</i> | Uam24064  | Sixes, Curry, OR, USA            | female | see Hailer et al. (2012)              | --                                                             | --                    |
| 18 | American black bear | <i>Ursus americanus</i> | Uam6586   | Garfield, CO, USA                | female | see Hailer et al. (2012)              | --                                                             | --                    |
| 19 | American black bear | <i>Ursus americanus</i> | Uam6616   | Humboldt, CA, USA                | female | see Hailer et al. (2012)              | --                                                             | --                    |
| 20 | American black bear | <i>Ursus americanus</i> | UamC122   | unknown                          | male   | see Hailer et al. (2012)              | --                                                             | --                    |
| 21 | American black bear | <i>Ursus americanus</i> | UamMTM33  | MT, USA                          | male   | --                                    | HG975062-HG975066;<br>HG423286-HG423287<br>(Bidon et al. 2014) | --                    |
| 22 | Brown bear          | <i>Ursus arctos</i>     | Uar001    | Rumania                          | female | see Hailer et al. (2012)              | --                                                             | --                    |
| 23 | Brown bear          | <i>Ursus arctos</i>     | UarKamK05 | Kamchatka, Russia                | male   | HG974859-HG974886                     | --                                                             | --                    |
| 24 | Brown bear          | <i>Ursus arctos</i>     | Uar1254   | Shoshone NF Park, WY, USA        | female | see Hailer et al. (2012)              | --                                                             | --                    |
| 25 | Brown bear          | <i>Ursus arctos</i>     | UarA9106  | Admiralty Island, AK, USA        | male   | see Hailer et al. (2012)              | --                                                             | --                    |
| 26 | Brown bear          | <i>Ursus arctos</i>     | UarBT1-8  | Norway                           | male   | see Hailer et al. (2012)              | HG975067-HG975071;<br>HG423290-HG423291<br>(Bidon et al. 2014) | --                    |
| 27 | Polar bear          | <i>Ursus maritimus</i>  | UmaB26    | Turner Island, eastern Greenland | female | see Hailer et al. (2012)              | --                                                             | --                    |
| 28 | Polar bear          | <i>Ursus maritimus</i>  | UmaB38    | Savissivik, western Greenland    | male   | see Hailer et al. (2012)              | --                                                             | --                    |
| 29 | Polar bear          | <i>Ursus maritimus</i>  | UmaAKL29  | Chukchi Sea population, AK, USA  | male   | HG974887-HG974914                     | --                                                             | --                    |
| 30 | Polar bear          | <i>Ursus maritimus</i>  | UmaDSL57  | Davis Strait population, Canada  | male   | HG974915-HG974942                     | --                                                             | --                    |
| 31 | Polar bear          | <i>Ursus maritimus</i>  | Uma009    | Point Lay, AK, USA               | male   | see Hailer et al. (2012)              | --                                                             | --                    |
| 32 | Polar bear          | <i>Ursus maritimus</i>  | UmaDSL51  | Davis Strait population, Canada  | male   | --                                    | HG975072-HG975076;<br>HG423302-HG423303<br>(Bidon et al. 2014) | --                    |

|                                                               | Species name        | Scientific name               | Lab ID | Geographic origin | Sex     | Accession numbers and/or source study |                          |                       |
|---------------------------------------------------------------|---------------------|-------------------------------|--------|-------------------|---------|---------------------------------------|--------------------------|-----------------------|
|                                                               |                     |                               |        |                   |         | Autosomal markers                     | Y-chromosomal markers    | Mitochondrial genomes |
| <b>Autosomal and Y-chromosomal markers (previous studies)</b> |                     |                               |        |                   |         |                                       |                          |                       |
| 33                                                            | Giant panda         | <i>Ailuropoda melanoleuca</i> | --     | unknown           | unknown | see Pagès et al. (2008)               | see Pagès et al. (2008)  | --                    |
| 34                                                            | Giant panda         | <i>Ailuropoda melanoleuca</i> | --     | unknown           | unknown | --                                    | see Nakagome et al. 2008 | --                    |
| 35                                                            | Spectacled bear     | <i>Tremarctos ornatus</i>     | --     | unknown           | unknown | see Pagès et al. (2008)               | see Pagès et al. (2008)  | --                    |
| 36                                                            | Spectacled bear     | <i>Tremarctos ornatus</i>     | --     | unknown           | unknown | --                                    | see Nakagome et al. 2008 | --                    |
| 37                                                            | Sloth bear          | <i>Melursus ursinus</i>       | --     | unknown           | unknown | see Pagès et al. (2008)               | see Pagès et al. (2008)  | --                    |
| 38                                                            | Sloth bear          | <i>Melursus ursinus</i>       | --     | unknown           | unknown | --                                    | see Nakagome et al. 2008 | --                    |
| 39                                                            | Sun bear            | <i>Helarctos malayanus</i>    | --     | unknown           | unknown | see Pagès et al. (2008)               | see Pagès et al. (2008)  | --                    |
| 40                                                            | Sun bear            | <i>Helarctos malayanus</i>    | --     | unknown           | unknown | --                                    | see Nakagome et al. 2008 | --                    |
| 41                                                            | Asian black bear    | <i>Ursus thibethanus</i>      | --     | unknown           | unknown | see Pagès et al. (2008)               | see Pagès et al. (2008)  | --                    |
| 42                                                            | Asian black bear    | <i>Ursus thibethanus</i>      | --     | unknown           | unknown | --                                    | see Nakagome et al. 2008 | --                    |
| 43                                                            | American black bear | <i>Ursus americanus</i>       | --     | unknown           | unknown | see Pagès et al. (2008)               | see Pagès et al. (2008)  | --                    |
| 44                                                            | American black bear | <i>Ursus americanus</i>       | --     | unknown           | unknown | --                                    | see Nakagome et al. 2008 | --                    |
| 45                                                            | Brown bear          | <i>Ursus arctos</i>           | --     | unknown           | unknown | see Pagès et al. (2008)               | see Pagès et al. (2008)  | --                    |
| 46                                                            | Brown bear          | <i>Ursus arctos</i>           | --     | unknown           | unknown | --                                    | see Nakagome et al. 2008 | --                    |
| 47                                                            | Polar bear          | <i>Ursus maritimus</i>        | --     | unknown           | unknown | see Pagès et al. (2008)               | see Pagès et al. (2008)  | --                    |
| 48                                                            | Polar bear          | <i>Ursus maritimus</i>        | --     | unknown           | unknown | --                                    | see Nakagome et al. 2008 | --                    |

|                                                 | Species name        | Scientific name               | Lab ID | Geographic origin | Sex     | Accession numbers and/or source study |                       |                                          |
|-------------------------------------------------|---------------------|-------------------------------|--------|-------------------|---------|---------------------------------------|-----------------------|------------------------------------------|
|                                                 |                     |                               |        |                   |         | Autosomal markers                     | Y-chromosomal markers | Mitochondrial genomes                    |
| <b>Mitochondrial genomes (previous studies)</b> |                     |                               |        |                   |         |                                       |                       |                                          |
| 49                                              | Giant panda         | <i>Ailuropoda melanoleuca</i> | --     | unknown           | unknown | --                                    | --                    | NC_009492<br>(Peng et al. 2007)          |
| 50                                              | Spectacled bear     | <i>Tremarctos ornatus</i>     | --     | unknown           | unknown | --                                    | --                    | NC_009969<br>(Yu et al. 2007)            |
| 51                                              | Sloth bear          | <i>Melursus ursinus</i>       | --     | unknown           | unknown | --                                    | --                    | NC_009970<br>(Yu et al. 2007)            |
| 52                                              | Sun bear            | <i>Helarctos malayanus</i>    | --     | unknown           | unknown | --                                    | --                    | NC_009968<br>(Yu et al. 2007)            |
| 53                                              | Asian black bear    | <i>Ursus thibethanus</i>      | --     | unknown           | unknown | --                                    | --                    | NC_009971<br>(Yu et al. 2007)            |
| 54                                              | American black bear | <i>Ursus americanus</i>       | --     | unknown           | unknown | --                                    | --                    | NC_003426<br>(Delisle and Strobeck 2002) |
| 55                                              | Brown bear          | <i>Ursus arctos</i>           | --     | unknown           | unknown | --                                    | --                    | NC_003427<br>(Delisle and Strobeck 2002) |
| 56                                              | Polar bear          | <i>Ursus maritimus</i>        | --     | unknown           | unknown | --                                    | --                    | NC_003428<br>(Delisle and Strobeck 2002) |

**Supplementary table S2: Mean p-distances between species (number of differences/total length).**

| Species pairs                     | 14 autosomal introns (present study) | 14 autosomal introns - consensus (present study) | 11 autosomal exon and intron markers (Pagès et al. 2008) |
|-----------------------------------|--------------------------------------|--------------------------------------------------|----------------------------------------------------------|
| Giant Panda - Spectacled bear     | 0.033                                | 0.032                                            | 0.022                                                    |
| Giant Panda - Sun bear            | 0.033                                | 0.032                                            | 0.021                                                    |
| Giant Panda - Sloth bear          | 0.032                                | 0.031                                            | 0.021                                                    |
| Giant Panda - Asian black bear    | 0.033                                | 0.032                                            | 0.020                                                    |
| Giant Panda - American black bear | 0.031                                | 0.030                                            | 0.020                                                    |
| Giant Panda - Brown bear          | 0.032                                | 0.031                                            | 0.021                                                    |
| Giant Panda - Polar bear          | 0.033                                | 0.032                                            | 0.021                                                    |
| Spectacled - Sun bear             | 0.017                                | 0.016                                            | 0.011                                                    |
| Spectacled - Sloth bear           | 0.017                                | 0.016                                            | 0.012                                                    |
| Spectacled - Asian black bear     | 0.017                                | 0.016                                            | 0.012                                                    |
| Spectacled - American black bear  | 0.016                                | 0.015                                            | 0.011                                                    |
| Spectacled - Brown bear           | 0.017                                | 0.015                                            | 0.013                                                    |
| Spectacled - Polar bear           | 0.017                                | 0.016                                            | 0.013                                                    |
| Sun - Sloth bear                  | 0.008                                | 0.007                                            | 0.004                                                    |
| Sun - Asian black bear            | 0.009                                | 0.007                                            | 0.004                                                    |
| Sun - American black bear         | 0.009                                | 0.008                                            | 0.005                                                    |
| Sun - Brown bear                  | 0.009                                | 0.007                                            | 0.005                                                    |
| Sun - Polar bear                  | 0.009                                | 0.008                                            | 0.005                                                    |
| Sloth - Asian black bear          | 0.007                                | 0.005                                            | 0.004                                                    |
| Sloth - American black bear       | 0.008                                | 0.007                                            | 0.005                                                    |
| Sloth - Brown bear                | 0.009                                | 0.007                                            | 0.005                                                    |
| Sloth - Polar bear                | 0.009                                | 0.008                                            | 0.005                                                    |
| Asian black - American black bear | 0.007                                | 0.006                                            | 0.003                                                    |
| Asian black - Brown bear          | 0.008                                | 0.006                                            | 0.003                                                    |
| Asian black - Polar bear          | 0.008                                | 0.007                                            | 0.003                                                    |
| American black - Brown bear       | 0.007                                | 0.006                                            | 0.003                                                    |
| American black - Polar bear       | 0.007                                | 0.007                                            | 0.003                                                    |
| Brown - Polar bear                | 0.005                                | 0.003                                            | 0.003                                                    |

Calculations are based on (1) 14 autosomal introns (present study; 30 phased individuals), (2) 14 autosomal introns (present study; eight 50% majority-rule consensus individuals), and (3) 11 autosomal exon and intron markers from Pagès et al. (2008) (eight consensus individuals).

**Supplementary table S3: Pairwise divergence statistics for 5.9 kb from the Y chromosome and at 14 autosomal introns.**

| Species pairs                     | Y chromosome  | Autosomal introns |                   |                      |                                      |                                      | Sum of polymorphic sites |
|-----------------------------------|---------------|-------------------|-------------------|----------------------|--------------------------------------|--------------------------------------|--------------------------|
|                                   | Mean distance | Mean distance     | Fixed differences | Shared polymorphisms | Polymorphic in species 1, fixed in 2 | Polymorphic in species 2, fixed in 1 |                          |
| Giant Panda - Spectacled bear     | 212           | 259.8             | 253               | 0                    | 12                                   | 7                                    | 19                       |
| Giant Panda - Sun bear            | 215.5         | 266.5             | 253               | 0                    | 12                                   | 24                                   | 36                       |
| Giant Panda - Sloth bear          | 207           | 258.5             | 251               | 0                    | 12                                   | 10                                   | 22                       |
| Giant Panda - Asian black bear    | 205           | 262.8             | 235               | 0                    | 12                                   | 56                                   | 68                       |
| Giant Panda - American black bear | 208           | 250.4             | 232               | 0                    | 12                                   | 34                                   | 46                       |
| Giant Panda - Brown bear          | 208           | 258               | 232               | 0                    | 12                                   | 64                                   | 76                       |
| Giant Panda - Polar bear          | 209           | 262.7             | 255               | 0                    | 12                                   | 13                                   | 25                       |
| Spectacled - Sun bear             | 115.5         | 136.6             | 124               | 0                    | 7                                    | 24                                   | 31                       |
| Spectacled - Sloth bear           | 107           | 133.3             | 127               | 0                    | 7                                    | 10                                   | 17                       |
| Spectacled - Asian black bear     | 108           | 134.1             | 108               | 0                    | 7                                    | 56                                   | 63                       |
| Spectacled - American black bear  | 111           | 126               | 110               | 0                    | 7                                    | 33                                   | 40                       |
| Spectacled - Brown bear           | 111           | 133.2             | 107               | 0                    | 7                                    | 63                                   | 70                       |
| Spectacled - Polar bear           | 112           | 136.8             | 130               | 0                    | 7                                    | 13                                   | 20                       |
| Sun - Sloth bear                  | 34.5          | 62.3              | 49                | 0                    | 24                                   | 10                                   | 34                       |
| Sun - Asian black bear            | 34.5          | 68.2              | 34                | 0                    | 24                                   | 56                                   | 80                       |
| Sun - American black bear         | 40.5          | 73.6              | 52                | 0                    | 24                                   | 34                                   | 58                       |
| Sun - Brown bear                  | 40.5          | 69.6              | 36                | 1                    | 23                                   | 63                                   | 87                       |
| Sun - Polar bear                  | 41.5          | 70.1              | 57                | 1                    | 23                                   | 12                                   | 36                       |
| Sloth - Asian black bear          | 24            | 55.1              | 32                | 1                    | 9                                    | 55                                   | 65                       |
| Sloth - American black bear       | 32            | 63.3              | 47                | 0                    | 10                                   | 34                                   | 44                       |
| Sloth - Brown bear                | 32            | 74.3              | 48                | 0                    | 10                                   | 64                                   | 74                       |
| Sloth - Polar bear                | 33            | 73.5              | 66                | 0                    | 10                                   | 13                                   | 23                       |
| Asian black - American black bear | 30            | 58.1              | 23                | 4                    | 52                                   | 30                                   | 86                       |
| Asian black - Brown bear          | 30            | 61.6              | 21                | 10                   | 46                                   | 54                                   | 110                      |
| Asian black - Polar bear          | 31            | 65.7              | 38                | 0                    | 56                                   | 13                                   | 69                       |
| American black - Brown bear       | 16            | 56.6              | 20                | 3                    | 31                                   | 61                                   | 95                       |
| American black - Polar bear       | 17            | 59.6              | 42                | 0                    | 34                                   | 13                                   | 47                       |
| Brown - Polar bear                | 13            | 38.9              | 14                | 1                    | 63                                   | 12                                   | 76                       |



**Supplementary table S4: Haplotype sharing among bear species (fig. 1, supplementary figure S1).**

|                     | Giant panda | Spectacled bear | Sun bear                | Sloth bear | Asian black bear        | American black bear     | Brown bear              | Polar bear |
|---------------------|-------------|-----------------|-------------------------|------------|-------------------------|-------------------------|-------------------------|------------|
| Giant panda         | ---         |                 |                         |            |                         |                         |                         |            |
| Spectacled bear     | -           | ---             |                         |            |                         |                         |                         |            |
| Sun bear            | -           | -               | ---                     |            |                         |                         |                         |            |
| Sloth bear          | -           | -               | 2 loci,<br>2 haplotypes | ---        |                         |                         |                         |            |
| Asian black bear    | -           | -               | 2 loci,<br>2 haplotypes | -          | ---                     |                         |                         |            |
| American black bear | -           | -               | -                       | -          | 2 loci,<br>2 haplotypes | ---                     |                         |            |
| Brown bear          | -           | -               | -                       | -          | 2 loci,<br>2 haplotypes | 3 loci,<br>4 haplotypes | ---                     |            |
| Polar bear          | -           | -               | 2 loci,<br>2 haplotypes | -          | -                       | 1 locus,<br>1 haplotype | 5 loci,<br>5 haplotypes | ---        |

**Supplementary table S5: Datasets analyzed in the present study.**

| Dataset                                                                                                                                                     | Sequence alignments                                                                                                                                                                                  | Alignment length [bp] |
|-------------------------------------------------------------------------------------------------------------------------------------------------------------|------------------------------------------------------------------------------------------------------------------------------------------------------------------------------------------------------|-----------------------|
| <b>A. Concatenated alignments reconstructed for traditional phylogenetic analyses</b>                                                                       |                                                                                                                                                                                                      |                       |
| 14 autosomal introns                                                                                                                                        | 14 autosomal introns (present study)                                                                                                                                                                 | 7,991                 |
| 5.9 kb Y-chromosomal sequence                                                                                                                               | 9 Y-chromosomal markers (present study)                                                                                                                                                              | 5,907                 |
| 15 nuclear markers                                                                                                                                          | 14 autosomal introns (present study) +<br>9 Y-chromosomal markers (present study)                                                                                                                    | 13,898                |
| 9.7 kb Y-chromosomal sequence (total evidence)                                                                                                              | 9 Y-chromosomal markers (present study) +<br>2 Y-chromosomal markers from Nakagome et al. (2008) +<br>3 Y-chromosomal markers from Pagès et al. (2008)                                               | 9,794                 |
| Mitochondrial genomes                                                                                                                                       | Protein-coding regions from the mitochondrial genomes (excluding ND6) (Jameson et al. 2003)                                                                                                          | 10,807                |
| <b>B. Alignments included in multi-locus species tree analyses (*BEAST) and population genetic analyses under the isolation-with-migration model (IMa2)</b> |                                                                                                                                                                                                      |                       |
| 14 autosomal introns                                                                                                                                        | 14 autosomal introns (present study)                                                                                                                                                                 | 7,991                 |
| 14 autosomal introns (non-recombining)                                                                                                                      | Largest non-recombining sections from 14 autosomal introns (present study) as reconstructed in IMgc (Woerner et al. 2007)                                                                            | 5,127                 |
| 15 nuclear markers                                                                                                                                          | 14 autosomal introns (present study) +<br>5.9 kb Y-chromosomal sequence (present study)                                                                                                              | 13,898                |
| 30 nuclear markers (total evidence)                                                                                                                         | 14 autosomal introns (present study) +<br>9.7 kb Y-chromosomal sequence (total evidence) +<br>4 X chromosomal markers from Nakagome et al. (2008) +<br>11 autosomal markers from Pagès et al. (2008) | 28,681                |

A. Concatenated alignments reconstructed for traditional phylogenetic analyses and for topology tests. For concatenation, one 50%-majority-rule-consensus individual was reconstructed per species from sequence data generated in the present study. B. Alignments included in multi-locus species tree analyses (\*BEAST) and population genetic analyses under the isolation-with-migration model (IMa2).

### Supplementary table S6: Results from approximately unbiased (AU) topology tests.

#### A. Mitochondrial genomes (protein-coding regions, excl. ND6).

| Topologies                                                                           | p-value<br>AU test | LogL      | ΔLogL |
|--------------------------------------------------------------------------------------|--------------------|-----------|-------|
| <b>Top 5 topologies, ranked according to p-value</b>                                 |                    |           |       |
| (((Uma,Uar),Mur),((Uam,Uth),Hma)),Tor,Ame);                                          | 0.75               | -36097.13 | 0.00  |
| (((Uma,Uar),((Uam,Uth),Hma),Mur)),Tor,Ame);                                          | 0.65               | -36097.02 | -0.11 |
| (((Uma,Uar),((Uam,Uth),Hma)),Mur),Tor,Ame); (Krause et al. 2008)                     | 0.44               | -36096.99 | -0.14 |
| (((Uma,Uar),((Uam,Hma),Uth)),Mur),Tor,Ame);                                          | 0.26               | -36101.45 | 4.32  |
| (((Uma,Uar),Mur),((Uam,Hma),Uth)),Tor,Ame);                                          | 0.21               | -36101.57 | 4.44  |
| <b>Nuclear DNA topologies</b>                                                        |                    |           |       |
| (((Uma,Uar),Uam),(Uth,(Hma,Mur))),Tor,Ame); (fig. 2A)                                | 0.00               | -36131.84 | 34.71 |
| (((Uma,Uar),Uam),(Uth,Mur),Hma)),Tor,Ame); (fig. 2B, suppl. fig. S2)                 | 0.00               | -36131.86 | 34.73 |
| (((Uma,Uar),Uam),Uth),(Hma,Mur)),Tor,Ame); (Nakagome et al. 2008; Pagès et al. 2008) | 0.00               | -36131.79 | 34.66 |
| ((((Uma,Uar),Uam),Uth),Mur),Hma)),Tor,Ame); (Pagès et al. 2008)                      | 0.00               | -36131.53 | 34.40 |
| ((((Uma,Uar),Uam),Uth),Hma),Mur),Tor,Ame); (Pagès et al. 2008)                       | 0.00               | -36128.41 | 31.28 |

#### B. 5.9 kb Y-chromosomal sequence (present study).

| Topologies                                                                            | p-value<br>AU test | LogL      | ΔLogL |
|---------------------------------------------------------------------------------------|--------------------|-----------|-------|
| <b>Top 5 topologies, ranked according to p-value</b>                                  |                    |           |       |
| (((Uma,Uar),Uam),(Uth,Mur),Hma)),Tor,Ame); (fig. 2B, suppl. fig. S2)                  | 0.89               | -10141.62 | 0.00  |
| (((Uma,Uar),Uam),(Uth,(Hma,Mur))),Tor,Ame); (fig. 2A)                                 | 0.71               | -10142.80 | 1.18  |
| ((((Uma,Uar),Uam),Uth),Hma),Mur),Tor,Ame); (Pagès et al. 2008)                        | 0.44               | -10144.61 | 2.99  |
| ((((Uma,Uar),Uam),Uth),(Hma,Mur)),Tor,Ame); (Nakagome et al. 2008; Pagès et al. 2008) | 0.34               | -10144.77 | 3.15  |
| ((((Uma,Uar),Uam),Hma),(Uth,Mur)),Tor,Ame);                                           | 0.30               | -10143.67 | 2.05  |
| <b>Additional nuclear topologies</b>                                                  |                    |           |       |
| ((((Uma,Uar),Uam),Uth),Mur),Hma)),Tor,Ame); (Pagès et al. 2008)                       | 0.00               | -10144.6  | 2.98  |
| <b>mtDNA topologies</b>                                                               |                    |           |       |
| (((Uma,Uar),Mur),((Uam,Uth),Hma)),Tor,Ame);                                           | 0.00               | -10214.81 | 73.19 |
| (((Uma,Uar),((Uam,Uth),Hma),Mur)),Tor,Ame);                                           | 0.00               | -10213.06 | 71.44 |
| (((Uma,Uar),((Uam,Uth),Hma)),Mur),Tor,Ame); (Krause et al. 2008)                      | 0.00               | -10214.85 | 73.23 |

#### C. 9.7 kb of Y-chromosomal sequence (total evidence): 5.9 kb Y-chromosomal sequence (present study) concatenated with five Y-linked markers from Pagès et al. (2008) and Nakagome et al. (2008).

| Topologies                                                                            | p-value<br>AU test | LogL      | ΔLogL  |
|---------------------------------------------------------------------------------------|--------------------|-----------|--------|
| <b>Top 5 topologies, ranked according to p-value</b>                                  |                    |           |        |
| (((Uma,Uar),Uam),(Uth,Mur),Hma)),Tor,Ame); (fig. 2B, suppl. fig. S2)                  | 0.92               | -16672.99 | 0.00   |
| ((((Uma,Uar),Uam),Uth),Mur),Hma)),Tor,Ame);                                           | 0.75               | -16674.60 | 1.61   |
| (((Uma,Uar),Uam),(Uth,(Hma,Mur))),Tor,Ame); (fig. 2A)                                 | 0.62               | -16674.33 | 1.34   |
| ((((Uma,Uar),Uam),Uth),Mur),Hma)),Tor,Ame); (Pagès et al. 2008)                       | 0.32               | -16675.57 | 2.58   |
| ((((Uma,Uar),Uam),Uth),Hma),Mur),Tor,Ame); (Pagès et al. 2008)                        | 0.19               | -16675.57 | 2.58   |
| <b>Additional nuclear topologies</b>                                                  |                    |           |        |
| ((((Uma,Uar),Uam),Uth),(Hma,Mur)),Tor,Ame); (Nakagome et al. 2008; Pagès et al. 2008) | 0.14               | -16676.03 | 3.04   |
| <b>mtDNA topologies</b>                                                               |                    |           |        |
| (((Uma,Uar),Mur),((Uam,Uth),Hma)),Tor,Ame);                                           | 0.00               | -16795.51 | 122.52 |
| (((Uma,Uar),((Uam,Uth),Hma),Mur)),Tor,Ame);                                           | 0.00               | -16794.17 | 121.18 |
| (((Uma,Uar),((Uam,Uth),Hma)),Mur),Tor,Ame); (Krause et al. 2008)                      | 0.00               | -16795.70 | 122.71 |

Ame: giant panda, Tor: spectacled bear, Hma: sun bear, Mur: sloth bear, Uth: Asian black bear, Uam: American black bear, Uar: brown bear, Uma: polar bear.

**Supplementary table S7: Genetic diversity within bear species based on 14 autosomal introns and 5.9 kb from the Y chromosome.**

| Species             | <i>n</i> (total) | Autosomes |          |                            | Y chromosome |          |                            |
|---------------------|------------------|-----------|----------|----------------------------|--------------|----------|----------------------------|
|                     |                  | <i>n</i>  | <i>S</i> | $\pi$ ( $\times 10^{-3}$ ) | <i>n</i>     | <i>S</i> | $\pi$ ( $\times 10^{-3}$ ) |
| Giant panda         | 2                | 2         | 12       | 1.4 $\pm$ 1.0              | 1            | -        | -                          |
| Spectacled bear     | 2                | 2         | 7        | 0.6 $\pm$ 0.5              | 2            | 0        | 0.0 $\pm$ 0.0              |
| Sun bear            | 3                | 3         | 24       | 2.0 $\pm$ 1.2              | 2            | 1        | 0.2 $\pm$ 0.2              |
| Sloth bear          | 3                | 3         | 10       | 1.1 $\pm$ 0.7              | 2            | 0        | 0.0 $\pm$ 0.0              |
| Asian black bear    | 3                | 3         | 55       | 5.1 $\pm$ 3.0              | 1            | -        | -                          |
| American black bear | 8                | 7         | 34       | 2.1 $\pm$ 1.1              | 1            | -        | -                          |
| Brown bear          | 5                | 5         | 64       | 4.4 $\pm$ 2.4              | 1            | -        | -                          |
| Polar bear          | 6                | 5         | 13       | 0.8 $\pm$ 0.5              | 1            | -        | -                          |

*n* = number of analyzed individuals; *S* = number of segregating sites;  $\pi$  = Tamura-Nei-corrected nucleotide diversity ( $\pi \pm$  S.D.). Note that for American black bears and polar bears, different individuals were sequenced for autosomal and Y-chromosomal markers (see supplementary table S1).

**Supplementary table S8: Primers (in 5' to 3' orientation) and amplification conditions of 14 autosomal introns and nine Y-linked markers.**

| Marker                         | Forward primer                    | Reverse primer                       | gene (intron#)      | size [bp] | T [°C]             |
|--------------------------------|-----------------------------------|--------------------------------------|---------------------|-----------|--------------------|
| 1247                           | TATTGGTGGAGGCTTCACAG              | AGACATCCAACAAAGGGCTG                 | <i>AZIN1</i> (6)    | 805       | 65-58 <sup>d</sup> |
| 2331                           | CCAGGATATTTTGAYGCAATC             | CTCAGCTTTYGGTAGGCAAC                 | <i>LRGUK</i> (14)   | 674       | 63-56 <sup>d</sup> |
| 3471                           | AKACTGAGTCCCAGCAGCAG              | CCRTTCTGGGAAACTTGCTC                 | <i>SPTBN1</i> (31)  | 712       | 67-60 <sup>d</sup> |
| 4464                           | TCCTTTCCAGAGCAARAAG               | TGGTCCTTGGCGAAGTTTAC                 | <i>ABCA1</i> (49)   | 738       | 58                 |
| 4779                           | TTTGCAAATCTFRAGAGCAGAG            | CAGTTGCTGCTTAACCTGTTC                | <i>CCDC90B</i> (4)  | 708       | 63-56 <sup>d</sup> |
| 7545                           | GGGAAAGTCCGGTTTTTG                | TTTCTCAGACACCCCTGTCCC                | <i>GGA3</i> (3)     | 726       | 58                 |
| 9072                           | TTTCATCGGTGTCATCATCG              | TGTCATGAAGATGTCTGGC                  | <i>SCN5A</i> (24)   | 694       | 65-58 <sup>d</sup> |
| 9205                           | CYAAATGTCGGAGTGCRGGG              | CTTGGCAATAGCTTTGGCTG                 | <i>ATP12A</i> (12)  | 817       | 65-58 <sup>d</sup> |
| 11080                          | AAGGGCAAGCTGTTGTAAGR              | TCAGCTTTRGTTCATTTC                   | <i>PREX2</i> (29)   | 753       | 67-60 <sup>d</sup> |
| 13102                          | ACACYGTGGGKTTATGGAGC              | TCCACACAGATAGCCCAAGG                 | <i>TRAPPC10</i> (8) | 690       | 65-58 <sup>d</sup> |
| 15923 <sup>a</sup>             | CTGAGCCCAAGTTCGAGAAG <sup>a</sup> | GTGTAGTCTCCAGGGAGATATAG <sup>a</sup> | <i>SPTA1</i> (51)   | 739       | 68-58 <sup>d</sup> |
| 17701 <sup>b</sup>             | CTCAGTGGTAGCCAAGGACC              | GCTGGAGTTGGAGGAATCAG                 | <i>IGSF22</i> (15)  | 692       | 67-60 <sup>d</sup> |
| 22245                          | TTCYTGGAAATTGACCCAAC              | GGCTGAAGGACTCCTCRCTG                 | <i>SEL1L3</i> (20)  | 714       | 58                 |
| <i>OSTA-5</i>                  | TGMWGGYCATGGTGGAGGCTTTG           | AGATGCRCRTCRGGGAYGAGRAACA            | <i>OSTA</i> (5)     | 724       | 67-60 <sup>d</sup> |
|                                |                                   |                                      |                     |           |                    |
| <i>318.2C_Ame</i> <sup>c</sup> | AAGAACTGTATTCCATCTRTCC            | AGKAAATGTGAAAGTACTGGTTAC             | Y chr. <sup>g</sup> | 979       | 69-62 <sup>d</sup> |
| <i>318.3C</i>                  | CGACCTTGACCAACAAGAGG              | GAGATGGTCTCTGCAAGATGG                | Y chr.              | 1216      | 66-61 <sup>e</sup> |
| <i>318.3C_Ame</i> <sup>c</sup> | CCCTRTGCCATCATAAATCCC             | TTAAGGCTGTGTTTGTAGTGCC               | Y chr.              | 724       | 69-62 <sup>d</sup> |
| <i>318.7C</i>                  | TCTTCGTCTTCATGCTGTGG              | CCAGCTCCTTATATGCTGAACC               | Y chr.              | 1095      | 68-58 <sup>f</sup> |
| <i>318.7C_Ame</i> <sup>c</sup> | TTGGAGGAGTCAGCTGATGAG             | TGTTGGTGTTCAGTTGATGTTG               | Y chr.              | 766       | 69-62 <sup>d</sup> |
| <i>579.3C</i>                  | TTAACTGCTCTGACCTTCATCG            | GTGCACAGGCAAGTGTAGG                  | Y chr.              | 1157      | 68-58 <sup>f</sup> |
| <i>579.3C_Ame</i> <sup>c</sup> | AATGAACTGCTTGACCTTCG              | TGATGGAGGAAATTGAGTGC                 | Y chr.              | 1174      | 68-61 <sup>d</sup> |
| <i>318.10B</i>                 | TGCACAGTTCATGGCTACAG              | TCAGCAGACATTTCTTGGAAC                | Y chr.              | 529       | 66-61 <sup>b</sup> |
| <i>318.11C</i>                 | GATGATGCATAAGCAATCCTTG            | TGCAACCATAACTTGTTTACTTCC             | Y chr.              | 1012      | 69-64 <sup>e</sup> |
| <i>389</i>                     | ACCCACTGCTGTTCTGTATCC             | CCAACAGTGTAGTGGTTGTGC                | Y chr.              | 679       | 68-61 <sup>d</sup> |
| <i>322</i>                     | GAGTAGAGCTGGTGTGTGAG              | GAAGCAGAGCTCAAGTCTGAAG               | Y chr.              | 821       | 70-63 <sup>d</sup> |
| <i>403</i>                     | CACCTCAGGAGACAGGTC                | TGTGTGTCGTAAGCAGAGGTC                | Y chr.              | 796       | 69-62 <sup>d</sup> |

Markers are named consecutively based on our list of aligned giant panda and dog sequences, with the numbering reflecting their relative position along the dog chromosomes. Gene and intron numbers in the giant panda are given; size for nuclear markers denotes expected amplicon size in base pairs in the giant panda; and T is the annealing temperature used in PCR. Y-specific markers are indicated in the column "gene" and named based on the scaffold they were obtained from.

<sup>a</sup> The primers for this locus were newly designed compared to Hailer et al. (2012), to improve specificity.

<sup>b</sup> These sequences correct an error in the primer sequences given in Hailer et al. (2012).

<sup>c</sup> Panda-specific primers were designed, in case no PCR product was obtained in any of giant panda, spectacled bear, Asian black bear, sun bear or sloth bear.

<sup>d</sup> Touchdown PCR, during which the annealing temperature was lowered by 0.5°C in each of 14 cycles, followed by 26 normal cycles.

<sup>e</sup> Touchdown PCR, during which the annealing temperature was lowered by 0.5°C in each of 10 cycles, followed by 30 normal cycles.

<sup>f</sup> Touchdown PCR, during which the annealing temperature was lowered by 1.0°C in each of 10 cycles, followed by 30 normal cycles.

<sup>g</sup> This marker includes exon 4 of *Usp9Y*.

## Supplementary figures

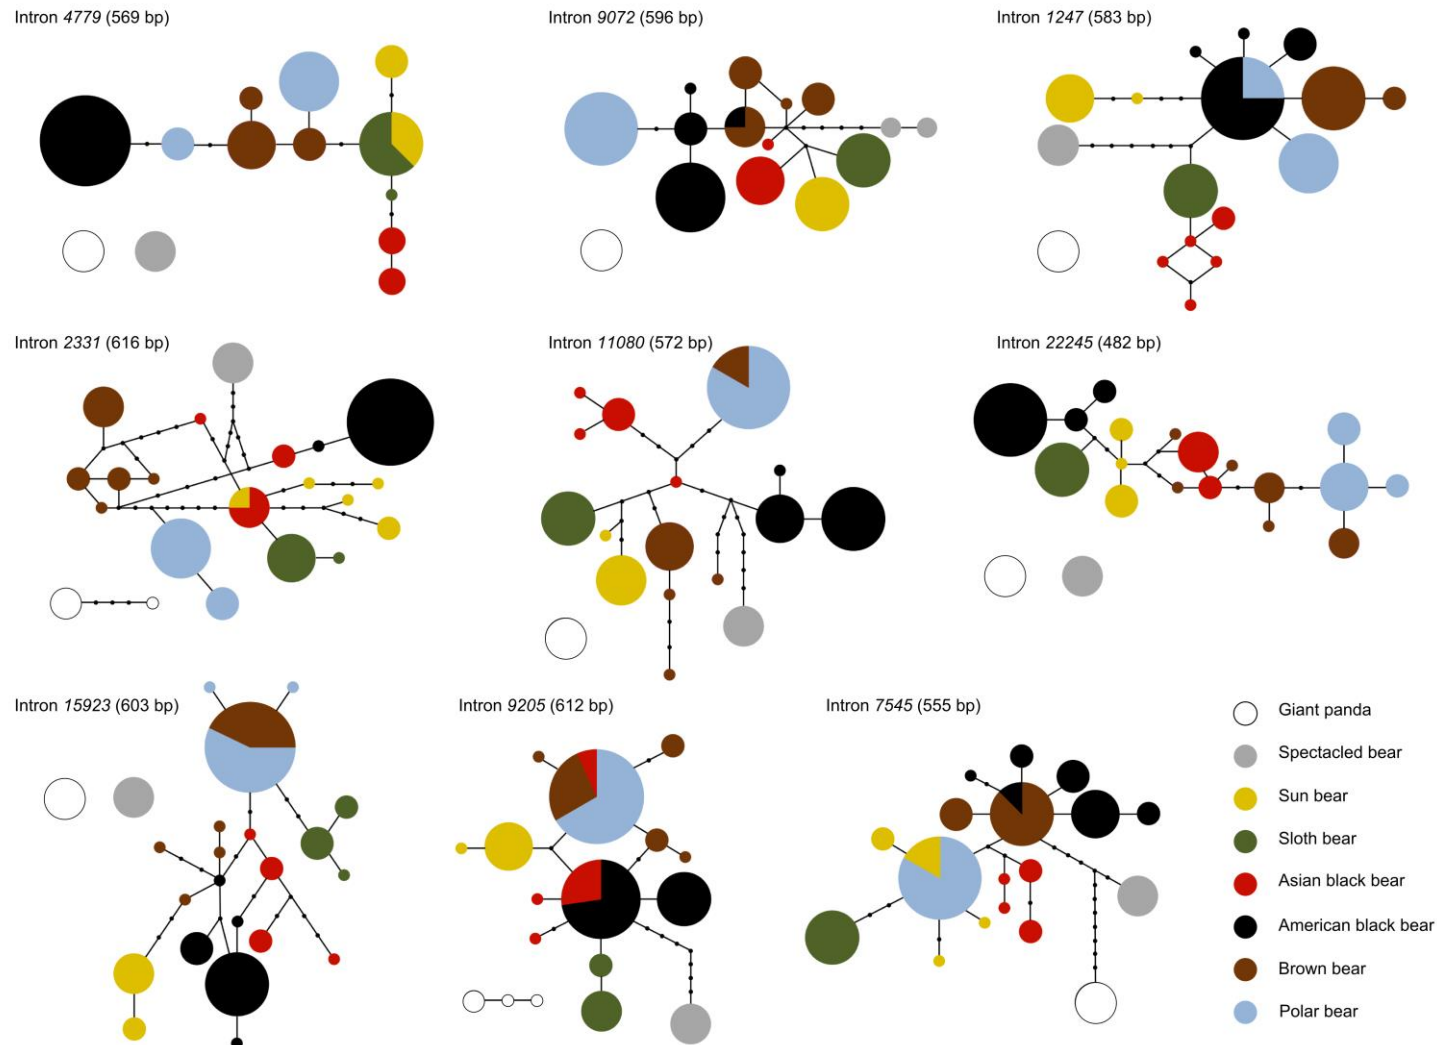

**Supplementary figure S1: Statistical parsimony networks for nine autosomal intron markers in bears.** Circle areas are proportional to haplotype frequencies and inferred intermediate states are shown as black dots. For some loci, spectacled bear and giant panda haplotypes were too divergent to be connected at the 95% credibility limit.

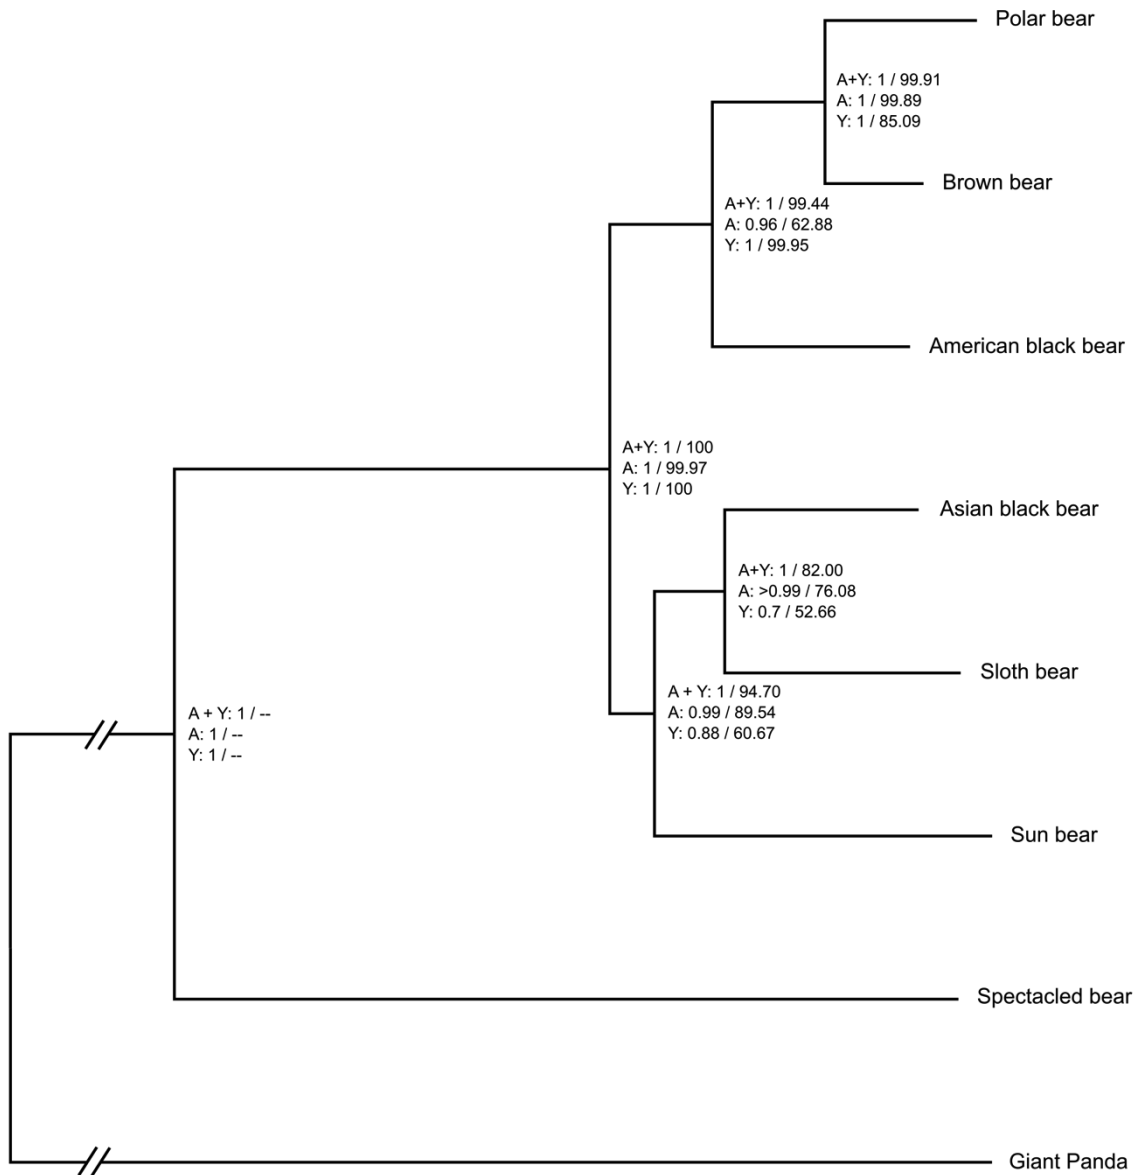

**Supplementary figure S2: Phylogenetic tree of 14 concatenated autosomal introns and 5.9 kb Y-chromosomal sequence obtained from MrBayes.** Numbers next to nodes denote branching support (first number: posterior probability values from MrBayes, second number: bootstrap values from maximum likelihood analyses in Treefinder), for three different datasets: (1) A+Y: 14 concatenated autosomal introns concatenated with nine Y-chromosomal markers, (2) A: 14 concatenated autosomal introns, and (3) Y: 5.9 kb Y-chromosomal sequence.

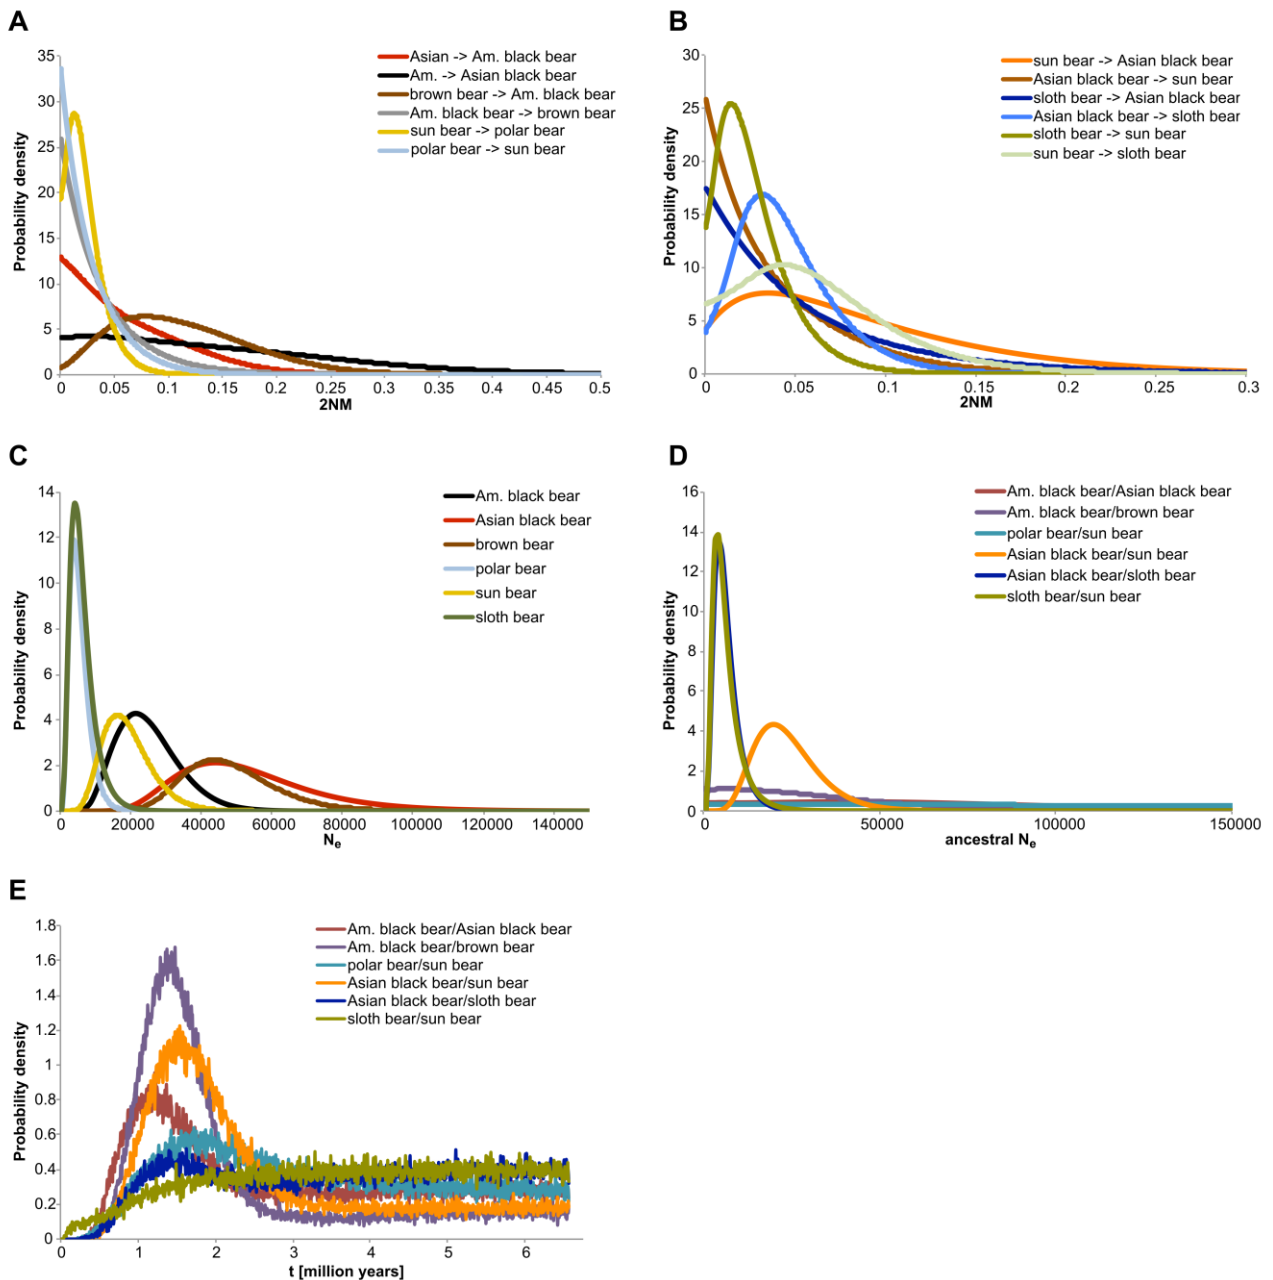

**Supplementary figure S3: Posterior probability distributions for parameters in IMA2 pairwise comparison analyses.** Curves are shown for (A) and (B) estimated population migration rates ( $2NM$ ) between species; (C) effective population sizes ( $N_e$ ) of the analyzed species; (D) effective population sizes of ancestral populations of the analyzed species pairs; (E) splitting time estimates (in million years).



## References

- Bidon T, Janke A, Fain SR, Eiken HG, Hagen SB, Saarma U, Hallström BM, Lecomte N, Hailer F. 2014. Brown and Polar Bear Y Chromosomes Reveal Extensive Male-Biased Gene Flow within Brother Lineages. *Mol. Biol. Evol.* 31:1353–1363.
- Delisle I, Strobeck C. 2002. Conserved Primers for Rapid Sequencing of the Complete Mitochondrial Genome from Carnivores, Applied to Three Species of Bears. *Mol. Biol. Evol.* 19:357–361.
- Hailer F, Kutschera VE, Hallström BM, Klassert D, Fain SR, Leonard JA, Arnason U, Janke A. 2012. Nuclear Genomic Sequences Reveal that Polar Bears Are an Old and Distinct Bear Lineage. *Science* 336:344–347.
- Jameson D, Gibson AP, Hudelot C, Higgs PG. 2003. OGRE: a relational database for comparative analysis of mitochondrial genomes. *Nucleic Acids Res.* 31:202–206.
- Jobb G, von Haeseler A, Strimmer K. 2004. TREEFINDER: a powerful graphical analysis environment for molecular phylogenetics. *BMC Evol. Biol.* 4:18.
- Krause J, Unger T, Nocon A, Malaspinas A-S, Kolokotronis S-O, Stiller M, Soibelzon L, Spriggs H, Dear PH, Briggs AW, et al. 2008. Mitochondrial genomes reveal an explosive radiation of extinct and extant bears near the Miocene-Pliocene boundary. *BMC Evol. Biol.* 8:220.
- Li R, Fan W, Tian G, Zhu H, He L, Cai J, Huang Q, Cai Q, Li B, Bai Y, et al. 2010. The sequence and de novo assembly of the giant panda genome. *Nature* 463:311–317.
- Nakagome S, Pecon-Slattery J, Masuda R. 2008. Unequal Rates of Y Chromosome Gene Divergence During Speciation of the Family Ursidae. *Mol. Biol. Evol.* 25:1344–1356.
- Pagès M, Calvignac S, Klein C, Paris M, Hughes S, Hänni C. 2008. Combined analysis of fourteen nuclear genes refines the Ursidae phylogeny. *Mol. Phylogenet. Evol.* 47:73–83.
- Peng R, Zeng B, Meng X, Yue B, Zhang Z, Zou F. 2007. The complete mitochondrial genome and phylogenetic analysis of the giant panda (*Ailuropoda melanoleuca*). *Gene* 397:76–83.
- Ronquist F, Teslenko M, van der Mark P, Ayres DL, Darling A, Höhna S, Larget B, Liu L, Suchard MA, Huelsenbeck JP. 2012. MrBayes 3.2: Efficient Bayesian Phylogenetic Inference and Model Choice Across a Large Model Space. *Syst. Biol.* 61:539–542.
- Woerner AE, Cox MP, Hammer MF. 2007. Recombination-Filtered Genomic Datasets by Information Maximization. *Bioinformatics* 23:1851–1853.
- Yu L, Li Y-W, Ryder O, Zhang Y-P. 2007. Analysis of complete mitochondrial genome sequences increases phylogenetic resolution of bears (Ursidae), a mammalian family that experienced rapid speciation. *BMC Evol. Biol.* 7:198.
